# Supplementary material for: Protein biomarkers to distinguish between major depressive disorder and bipolar disorder
Source: Research Square preprint supplement (doi:10.21203/rs.3.rs-7640890/v1), 2025-10-20
Supplement: Supplementary file 1 [file 6c9a8ee964670950b03558d7.docx]

**Supplementary table 1. Candidate proteins obtained through the discovery process**

| **No.** | **Gene** | **Uniprot ID** | **Protein** | ***t-*test result** | | | **Fold change** | | |
| --- | --- | --- | --- | --- | --- | --- | --- | --- | --- |
| **HC  vs.  MDD** | **HC  vs.  BD** | **MDD  vs.  BD** | **HC / MDD** | **HC / BD** | **MDD / BD** |
| 1 | GC | P02774 | Vitamin D-binding protein | ns | *** | **** | 1.13 | -1.36 | -1.53 |
| 2 | SAA4 | P35542 | Serum amyloid A-4 protein | ns | ** | ** | -1.08 | -1.43 | -1.32 |
| 3 | C8B | P07358 | Complement component C8 beta chain | ns | *** | ** | 1.51 | -1.3 | -1.96 |
| 4 | SERPINA4 | P29622 | Kallistatin | ns | ** | ** | 1.03 | 1.31 | 1.28 |
| 5 | PGLYRP2 | Q96PD5 | N-acetylmuramoyl-L-alanine amidase | ns | ** | * | 1.07 | 2.24 | 2.08 |
| 6 | CFB | P00751 | Complement factor B | ns | ** | ** | 1.04 | 1.28 | 1.23 |
| 7 | CFH | P08603 | Complement factor H | ns | ** | ** | 1.04 | -1.36 | -1.41 |
| 8 | KRT9 | P35527 | Keratin, type I cytoskeletal 9 | ns | * | ** | 1.11 | -1.98 | -2.2 |
| 9 | C1QA | P02745 | Complement C1q subcomponent subunit A | ns | * | * | -1.1 | -1.75 | -1.59 |
| 10 | APOA2 | P02652 | Apolipoprotein A-II | ns | * | ** | -1.05 | 1.4 | 1.48 |
| 11 | SERPINF2 | P08697 | Alpha-2-antiplasmin | ns | * | * | 1.01 | 1.27 | 1.26 |
| 12 | SERPINA7 | P05543 | Thyroxine-binding globulin | ns | * | * | 1.02 | 1.31 | 1.28 |
| 13 | PON3 | Q15166 | Serum paraoxonase/lactonase 3 | ns | * | * | 1.44 | -2.35 | -3.39 |
| 14 | APOE | P02649 | Apolipoprotein E | ns | * | * | 1.05 | 1.33 | 1.27 |
| 15 | ATRN | O75882 | Attractin | ns | *** | **** | -1.1 | 15.15 | 16.6 |
| 16 | AHSG | P02765 | Alpha-2-HS-glycoprotein | **** | ns | ** | 1.29 | -1.18 | -1.52 |
| 17 | FN1 | P02751 | Fibronectin | **** | ns | * | 1.49 | 1.07 | -1.39 |

HC : Healthy control, MDD : Major Depressive Disease, BD : biopolar disease, **p* < 0.05, ***p* < 0.01, ****p* < 0.001 and *****p* < 0.0001, minus is Down Regulation

**Supplementary table 2. Confusion matrix value for ROC results of disease-specific differentially expressed protein**

| **No.** | **Protein name** | **Comparisons** | **AUC** | **Specify** | **Recall** | **Negative Predictive Value** | **Precision** | **Accuracy** |
| --- | --- | --- | --- | --- | --- | --- | --- | --- |
| 1 | Vitamin D-binding protein | HC vs. MDD | 0.5570 | 50.00 | 67.65 | 56.00 | 62.16 | 59.68 |
| HC vs. BD | 0.9127 | 96.43 | 77.78 | 91.10 | 87.50 | 91.89 |
| MDD vs. BD | 0.9216 | 94.12 | 77.78 | 94.12 | 77.78 | 90.70 |
| 2 | Serum amyloid A-4 protein | HC vs. MDD | 0.6366 | 46.43 | 70.59 | 56.52 | 61.54 | 59.68 |
| HC vs. BD | 0.8849 | 96.43 | 55.56 | 87.10 | 83.33 | 86.49 |
| MDD vs. BD | 0.8464 | 100.00 | 44.44 | 87.18 | 100.00 | 88.37 |
| 3 | Complement component C8 beta chain | HC vs. MDD | 0.6019 | 28.57 | 79.41 | 53.33 | 57.45 | 56.45 |
| HC vs. BD | 0.8849 | 100.00 | 66.67 | 90.32 | 100.00 | 91.89 |
| MDD vs. BD | 0.7941 | 94.12 | 33.33 | 84.21 | 60.00 | 81.4 |
| 4 | Kallistatin | HC vs. MDD | 0.5809 | 10.71 | 85.29 | 37.50 | 53.70 | 51.61 |
| HC vs. BD | 0.8730 | 92.86 | 44.44 | 83.87 | 66.67 | 81.08 |
| MDD vs. BD | 0.7908 | 97.06 | 44.44 | 86.84 | 80.00 | 86.05 |
| 5 | N-acetylmuramoyl-L-alanine amidase | HC vs. MDD | 0.6124 | 25.00 | 85.29 | 58.33 | 58.00 | 58.06 |
| HC vs. BD | 0.8651 | 92.86 | 66.67 | 89.66 | 75.00 | 86.49 |
| MDD vs. BD | 0.8693 | 97.06 | 66.67 | 91.67 | 85.71 | 90.70 |
| 6 | Complement factor B | HC vs. MDD | 0.5956 | 25.00 | 76.47 | 46.67 | 55.32 | 53.23 |
| HC vs. BD | 0.8651 | 89.29 | 55.56 | 86.21 | 62.50 | 81.08 |
| MDD vs. BD | 0.7908 | 97.06 | 33.33 | 84.62 | 75.00 | 83.72 |
| 7 | Complement factor H | HC vs. MDD | 0.5609 | 14.29 | 82.35 | 40.00 | 53.85 | 51.61 |
| HC vs. BD | 0.8413 | 96.43 | 77.78 | 91.10 | 87.50 | 91.89 |
| MDD vs. BD | 0.8725 | 94.12 | 77.78 | 94.12 | 77.78 | 90.70 |
| 8 | Keratin, type I cytoskeletal 9 | HC vs. MDD | 0.5756 | 3.571 | 94.12 | 33.33 | 54.24 | 53.23 |
| HC vs. BD | 0.8175 | 96.43 | 33.33 | 81.82 | 75.00 | 81.08 |
| MDD vs. BD | 0.8497 | 97.06 | 33.33 | 84.62 | 75.00 | 83.72 |

| 9 | Complement C1q subcomponent subunit A | HC vs. MDD | 0.5536 | 17.86 | 91.18 | 62.50 | 57.41 | 58.06 |
| --- | --- | --- | --- | --- | --- | --- | --- | --- |
| HC vs. BD | 0.8095 | 96.43 | 44.44 | 84.38 | 80.00 | 83.78 |
| MDD vs. BD | 0.8007 | 97.06 | 44.44 | 86.84 | 80.00 | 86.05 |
| 10 | Apolipoprotein A-II | HC vs. MDD | 0.5473 | 17.86 | 82.35 | 45.45 | 54.90 | 53.23 |
| HC vs. BD | 0.8056 | 92.86 | 44.44 | 83.87 | 66.67 | 81.08 |
| MDD vs. BD | 0.8301 | 97.06 | 44.44 | 86.84 | 80.00 | 86.05 |
| 11 | Alpha-2-antiplasmin | HC vs. MDD | 0.5284 | 0.00 | 97.06 | 0.00 | 54.10 | 53.23 |
| HC vs. BD | 0.7778 | 100.00 | 66.67 | 90.32 | 100.00 | 91.89 |
| MDD vs. BD | 0.7810 | 97.06 | 44.44 | 86.84 | 80.00 | 86.05 |
| 12 | Thyroxine-binding globulin | HC vs. MDD | 0.5263 | 0.00 | 100.00 | 0.00 | 54.84 | 54.84 |
| HC vs. BD | 0.7738 | 89.29 | 22.22 | 78.13 | 40.00 | 72.97 |
| MDD vs. BD | 0.7516 | 97.06 | 11.11 | 80.49 | 50.00 | 79.07 |
| 13 | Serum paraoxonase/lactonase 3 | HC vs. MDD | 0.6733 | 17.86 | 85.29 | 50.00 | 55.77 | 54.84 |
| HC vs. BD | 0.7460 | 89.29 | 44.44 | 83.33 | 57.14 | 78.38 |
| MDD vs. BD | 0.8529 | 91.18 | 44.44 | 86.11 | 57.14 | 81.4 |
| 14 | Apolipoprotein E | HC vs. MDD | 0.5116 | 82.14 | 5.88 | 41.82 | 28.57 | 40.32 |
| HC vs. BD | 0.6984 | 100.00 | 11.11 | 77.78 | 100.00 | 78.38 |
| MDD vs. BD | 0.7451 | 97.06 | 22.22 | 82.5 | 66.67 | 81.4 |
| 15 | Attractin | HC vs. MDD | 0.5305 | 100 | 0.00 | 45.16 | 0.00 | 45.16 |
| HC vs. BD | 0.6746 | 100 | 0.00 | 75.68 | 0.00 | 75.68 |
| MDD vs. BD | 0.6961 | 100 | 0.00 | 79.07 | 0.00 | 79.07 |
| 16 | Alpha-2-HS-glycoprotein | HC vs. MDD | 0.7679 | 64.29 | 73.53 | 66.67 | 71.473 | 69.35 |
| HC vs. BD | 0.6548 | 96.43 | 22.22 | 79.41 | 66.67 | 78.38 |
| MDD vs. BD | 0.8725 | 97.06 | 44.44 | 86.84 | 80 | 86.05 |
| 17 | Fibronectin | HC vs. MDD | 0.7626 | 64.29 | 82.35 | 75 | 73.68 | 74.19 |
| HC vs. BD | 0.5119 | 100 | 0.00 | 75.68 | 0.00 | 75.68 |
| MDD vs. BD | 0.7353 | 97.06 | 44.44 | 86.84 | 80 | 86.05 |

**Supplementary table 3. MRM transition of 17 disease-specific biomarkers**

| **No.** | **Protein name** | **Peptide** | **Q3 ion type** | **Q1 m/z** | **Q3 m/z** | **DP** | **EP** | **CE** | **CXP** |
| --- | --- | --- | --- | --- | --- | --- | --- | --- | --- |
| 1 | Vitamin D-binding protein | THLPEVFLSK | 2b2* | 585.82951 | 239.11387 | 73.8 | 10 | 29.9 | 12 |
| 2b3 | 585.82951 | 352.19793 | 73.8 | 10 | 29.9 | 12 |
| 2y7 | 585.82951 | 819.46108 | 73.8 | 10 | 29.9 | 12 |
| 2 | Serum amyloid A-4 protein | EALQGVGDMGR | 2y5 | 566.77441 | 535.22931 | 72.4 | 10 | 29.3 | 12 |
| 2y7* | 566.77441 | 691.31919 | 72.4 | 10 | 29.3 | 12 |
| 2b2 | 566.77441 | 201.08698 | 72.4 | 10 | 29.3 | 12 |
| 3 | Complement component C8 beta chain | IPGIFELGISSQSDR | 2y8 | 809.92539 | 849.40609 | 90.2 | 10 | 38 | 12 |
| 2y6* | 809.92539 | 679.30056 | 90.2 | 10 | 38 | 12 |
| 2y14+2 | 809.92539 | 753.38336 | 90.2 | 10 | 38 | 12 |
| 4 | Kallistatin | LGFTDLFSK | 2y5* | 514.27658 | 609.32425 | 68.6 | 10 | 27.4 | 12 |
| 2y6 | 514.27658 | 710.37193 | 68.6 | 10 | 27.4 | 12 |
| 2y7 | 514.27658 | 857.44035 | 68.6 | 10 | 27.4 | 12 |
| 5 | N-acetylmuramoyl-L-alanine amidase | AFLNGALDGVILGDYLSR | 2y6* | 947.50708 | 710.34678 | 100.2 | 10 | 43 | 12 |
| 2y8 | 947.50708 | 936.51491 | 100.2 | 10 | 43 | 12 |
| 3y6 | 632.00715 | 710.34678 | 77.2 | 10 | 32 | 12 |
| 6 | Complement factor B | YGLVTYATYPK | 2b2* | 638.33462 | 221.09207 | 77.7 | 10 | 31.8 | 12 |
| 2b3 | 638.33462 | 334.17613 | 77.7 | 10 | 31.8 | 12 |
| 2y7 | 638.33462 | 843.4247 | 77.7 | 10 | 31.8 | 12 |
| 7 | Complement factor H | SSNLIILEEHLK | 2y7 | 698.39574 | 881.50909 | 82 | 10 | 34 | 12 |
| 3y5 | 465.93292 | 655.34097 | 65.1 | 10 | 22.9 | 12 |
| 3y6* | 465.93292 | 768.42503 | 65.1 | 10 | 22.9 | 12 |
| 8 | Keratin, type I cytoskeletal 9 | HGVQELEIELQSQLSK | 3b7* | 613.32666 | 793.38389 | 75.8 | 10 | 31 | 12 |
| 3y2 | 613.32666 | 234.14483 | 75.8 | 10 | 31 | 12 |
| 3y5 | 613.32666 | 562.3195 | 75.8 | 10 | 31 | 12 |

| 9 | Complement C1q subcomponent subunit A | SLGFCDTTNK | 3y3 | 362.50258 | 362.20341 | 57.5 | 10 | 17.3 | 12 |
| --- | --- | --- | --- | --- | --- | --- | --- | --- | --- |
| 3b7+2 | 362.50258 | 362.65216 | 57.5 | 10 | 17.3 | 12 |
| 2y8* | 543.25023 | 885.37709 | 70.7 | 10 | 28.4 | 12 |
| 10 | Apolipoprotein A-II | KAGTELVNFLSYF | 2y1 | 744.89029 | 166.08626 | 85.4 | 10 | 35.7 | 12 |
| 2y2* | 744.89029 | 329.14958 | 85.4 | 10 | 35.7 | 12 |
| 3b4+3 | 496.92929 | 120.07435 | 67.3 | 10 | 24.6 | 12 |
| 11 | Alpha-2-antiplasmin | WFLLEQPEIQVAHFPFK | 3b2* | 710.3788 | 334.155 | 82.9 | 10 | 36.2 | 12 |
| 3y3 | 710.3788 | 391.23398 | 82.9 | 10 | 36.2 | 12 |
| 3y6 | 710.3788 | 746.39842 | 82.9 | 10 | 36.2 | 12 |
| 12 | Thyroxine-binding globulin | NALALFVLPK | 2y7 | 543.33951 | 787.50764 | 70.7 | 10 | 28.4 | 12 |
| 2y6* | 543.33951 | 716.47052 | 70.7 | 10 | 28.4 | 12 |
| 2b2 | 543.33951 | 186.08732 | 70.7 | 10 | 28.4 | 12 |
| 13 | Serum paraoxonase/lactonase 3 | IFLMDLNEQNPR | 2y6 | 745.37703 | 757.35874 | 85.5 | 10 | 35.7 | 12 |
| 2y8* | 745.37703 | 985.46975 | 85.5 | 10 | 35.7 | 12 |
| 2y9 | 745.37703 | 1116.5102 | 85.5 | 10 | 35.7 | 12 |
| 14 | Apolipoprotein E | VQAAVGTSAAPVPSDNH | 2b3 | 810.90245 | 299.17138 | 90.2 | 10 | 38 | 12 |
| 2y5* | 810.90245 | 569.23142 | 90.2 | 10 | 38 | 12 |
| 2y7 | 810.90245 | 765.35259 | 90.2 | 10 | 38 | 12 |
| 15 | Attractin | LTLTPWVGLR | 2y6* | 578.34787 | 727.42497 | 80 | 10 | 27 | 12 |
| 2b2 | 578.34787 | 215.13902 | 80 | 10 | 25 | 12 |
| 2y7 | 578.34787 | 828.47265 | 80 | 10 | 25 | 12 |
| 16 | Alpha-2-HS-glycoprotein | HTFMGVVSLGSPSGEVSHPR | 3y9+2* | 694.34595 | 483.2436 | 81.7 | 10 | 35.4 | 12 |
| 4y11+2 | 521.01128 | 555.27034 | 69.1 | 10 | 25.9 | 12 |
| 4b6 | 521.01128 | 673.31264 | 69.1 | 10 | 25.9 | 12 |
| 17 | Fibronectin | NLQPASEYTVSLVAIK | 2b2 | 866.97763 | 228.13427 | 94.3 | 10 | 40.1 | 12 |
| 2b3* | 866.97763 | 356.19285 | 94.3 | 10 | 40.1 | 12 |
| 2y6 | 866.97763 | 630.41849 | 94.3 | 10 | 40.1 | 12 |

Declustering potential (DP), entrance potential (EP), collision energy (CE) and collision cell exit potential (CXP), * means a quantified value
